# Supplementary material for: A Multidisciplinary Approach for the Assessment of Origin, Fate and Ecotoxicity of Metal(loid)s from Legacy Coal Mine Tailings
Source: MDPI journal article supplement (doi:10.3390/toxics9070164), 2021-07-10
Supplement: s1 [file s1]

Article

# Supplementary Materials: A Multidisciplinary Approach for the Assessment of Origin, Fate and Ecotoxicity of Metal(loid)s from Legacy coal Mine Tailings

Honorine Gauthier-Manuel, Diane Radola, Flavien Choulet, Martine Buatier, Raphaël Vauthier, Tatiana Morvan, Walter Chavanne and Frédéric Gimbert

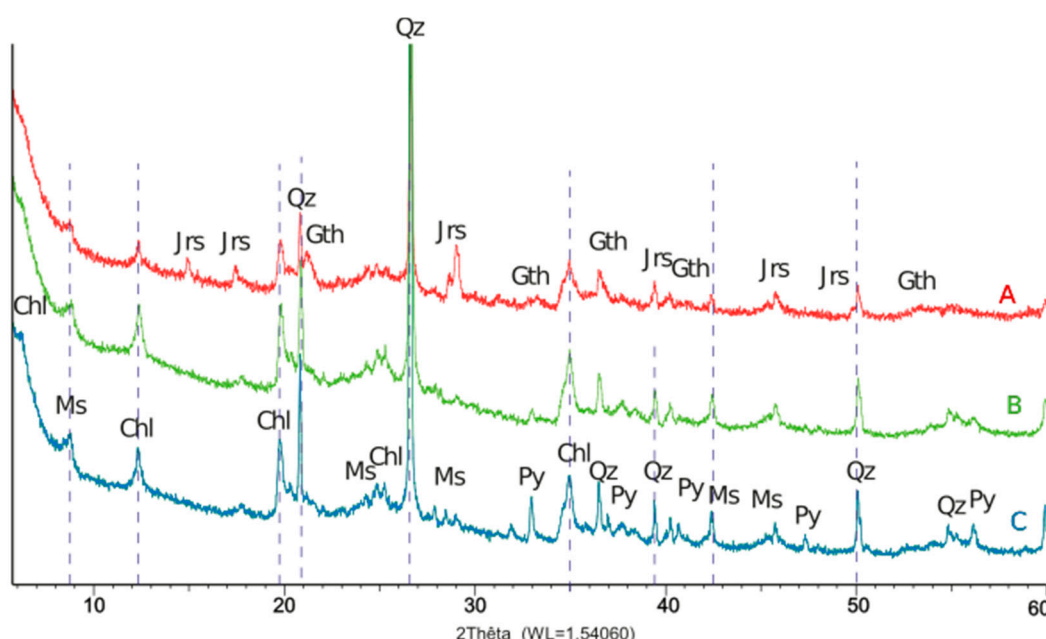

**Figure S1.** XRD patterns of bulk powders of shale from the studied area (A: West border of the tailing, B: former settling pond and C : proximity to AMD). Abbreviations: Chl: chlorite, Ms: muscovite, Qz: quartz, Py: pyrite, Gth: goethite and Jrs: jarosite.

**Table S1.** Concentrations of metal(loid)s bioaccumulated in the homogenate (H), soluble (S) and insoluble (P) fractions with a comparative relative difference (%) between H fraction and the sum of S and P.

| Fraction                                     | Station           | Al    | As    | Cd    | Co    | Cu    | Ni    | Pb    | Tl    | Zn    |
|----------------------------------------------|-------------------|-------|-------|-------|-------|-------|-------|-------|-------|-------|
| H                                            | Near downstream 1 | 93.3  | 2.04  | 2.92  | 0.66  | 13.9  | 3.77  | 2.57  | 0.023 | 79.8  |
| H                                            | Near downstream 2 | 81.3  | 1.76  | 2.51  | 0.71  | 13.3  | 2.21  | 2.21  | 0.018 | 79.3  |
| H                                            | Near downstream 3 | 87.4  | 1.91  | 3.21  | 0.66  | 18.7  | 1.66  | 2.65  | 0.022 | 73.7  |
| H                                            | Tributary 1       | 509.0 | 13.6  | 0.79  | 0.63  | 27.9  | 17.2  | 11.2  | 0.04  | 155.8 |
| H                                            | Tributary 2       | 724.8 | 22.0  | 0.72  | 0.35  | 33.0  | 10.6  | 12.9  | 0.05  | 138.9 |
| S+P                                          | Near downstream 1 | 114.7 | 2.16  | 3.23  | 0.73  | 15.6  | 3.37  | 2.56  | 0.025 | 80.6  |
| S+P                                          | Near downstream 2 | 100.6 | 1.96  | 2.87  | 0.71  | 16.3  | 2.35  | 2.49  | 0.023 | 75.2  |
| S+P                                          | Near downstream 3 | 89.0  | 1.85  | 3.30  | 0.65  | 19.4  | 1.63  | 2.55  | 0.023 | 73.4  |
| S+P                                          | Tributary 1       | 553.3 | 14.1  | 0.68  | 0.53  | 27.5  | 18.7  | 11.2  | 0.04  | 152.8 |
| S+P                                          | Tributary 2       | 705.7 | 20.6  | 0.62  | 0.35  | 31.1  | 10.4  | 12.5  | 0.05  | 130.5 |
| Relative difference<br>between H and S+P (%) | Near downstream 1 | 122.9 | 105.8 | 110.0 | 110.9 | 112.0 | 89.6  | 99.5  | 110.8 | 101.1 |
|                                              | Near downstream 2 | 123.7 | 111.3 | 114.7 | 100.0 | 122.4 | 106.1 | 112.6 | 128.7 | 94.9  |
|                                              | Near downstream 3 | 101.8 | 96.9  | 102.7 | 99.0  | 103.9 | 98.0  | 96.4  | 106.1 | 99.5  |
|                                              | Tributary 1       | 108.7 | 103.9 | 86.2  | 84.8  | 98.5  | 108.5 | 100.1 | 103.9 | 98.1  |
|                                              | Tributary 2       | 97.4  | 93.5  | 85.4  | 101.0 | 94.4  | 97.4  | 97.3  | 97.1  | 93.9  |
|                                              | Mean              | 110.9 | 102.3 | 99.8  | 99.1  | 106.2 | 99.9  | 101.2 | 109.3 | 97.5  |
|                                              | SD                | 12.0  | 7.1   | 13.5  | 9.3   | 11.2  | 7.6   | 6.6   | 11.9  | 3.0   |
